# Supplementary material for: Positive effects of concomitant heavy metals and their reduzates on hexavalent chromium removal in microbial fuel cells
Source: Royal Society of Chemistry journal article supplement (doi:10.1039/d0ra01471k), 2020-01-01
Supplement: d0ra01471k1.pdf [file d0ra01471k1.pdf]

## Supporting Information

### Positive effects of concomitant heavy metals and their redoxates on hexavalent chromium removal in microbial fuel cells

Xiayuan Wu<sup>a</sup> · Chunrui Li<sup>a</sup> · Zuopeng Lv<sup>b</sup> · Xiaowei Zhou<sup>c</sup> · Zixuan Chen<sup>a</sup> ·

Honghua Jia<sup>a</sup> · Jun Zhou<sup>a</sup> · Xiaoyu Yong<sup>a</sup> · Ping Wei<sup>a</sup> · Yan Li<sup>a,\*</sup>

<sup>a</sup>College of Biotechnology and Pharmaceutical Engineering, Nanjing Tech University, Nanjing 211816, China

<sup>b</sup>The Key Laboratory of Biotechnology for Medicinal Plants of Jiangsu Province, Jiangsu Normal University, Xuzhou 221116, China

<sup>c</sup>Department of Philosophy, Nanjing University, Nanjing 210023, China

**\*Corresponding author:**

Yan Li

Nanjing Tech University, No.30 Puzhu Road(S), Nanjing, 211816, Jiangsu, P.R.  
China

**Tel./Fax:** +86 25 58139929

**E-mail:** liyan@njtech.edu.cn

TEXT (1)

FIGURES (4)

PAGES (6)

## **Methods**

### **1. Transmission electron microscopy (TEM)**

The biogenic Au nanoparticles were prepared on carbon-coated copper grids and observed by using a TEM (JEM-2100, JEOL, Japan).

### **2. X-ray diffraction (XRD)**

The biogenic Au nanoparticles were identified on X-ray diffractometer (Smartlab TM 9KW, Japan) with Cu K $\alpha$  radiation. The dried Bio-Au powder was scanned between 5° to 80° 2 $\theta$ .

### **3. Optimization of Cr(VI)/Cu(II) concentration ratio**

As the initial concentration of Cr(VI) was set at 100 mg/L in the catholyte, different Cr(VI)/Cu(II) concentration ratios (2:1, 1:1, 1:2, 1:4) were investigated regarding of the Cr(VI) removal in MFCs. In this section, all experimental MFCs were connected to an external resistance of 1000  $\Omega$ .

### **4. Optimization of external resistance**

Different external resistances (10, 510, 1000, 2000  $\Omega$ ) were investigated regarding of the Cr(VI) removal in MFCs. In this section, the catholyte in all experimental MFCs contained Cr(VI) of 100 mg/L and Cu(II) of 400 mg/L (the Cr(VI)/Cu(II) concentration ratio in catholyte was set at 1:4).

### **5. Element analysis of electrode surface**

The element contents of the BioAu/MWCNT electrode surface before operation were analyzed by scanning electron microscopy with coupled energy dispersive spectroscopy (SEM-EDS, Hitachi S-4800, Japan).

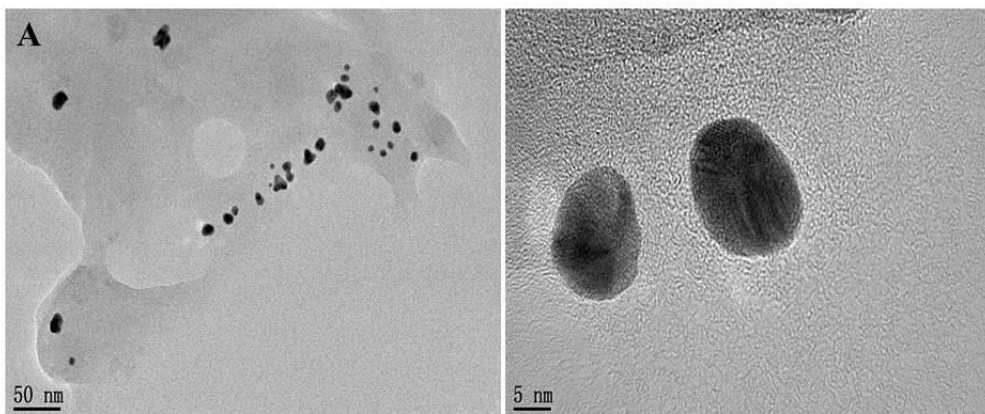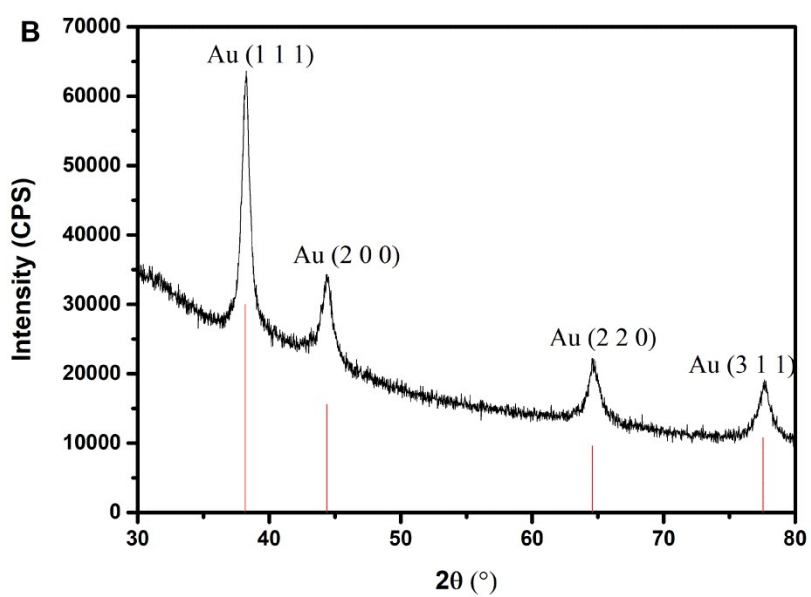

**Fig. S1.** TEM images (A) and powder XRD patterns (B) of the biogenic Au nanoparticles.

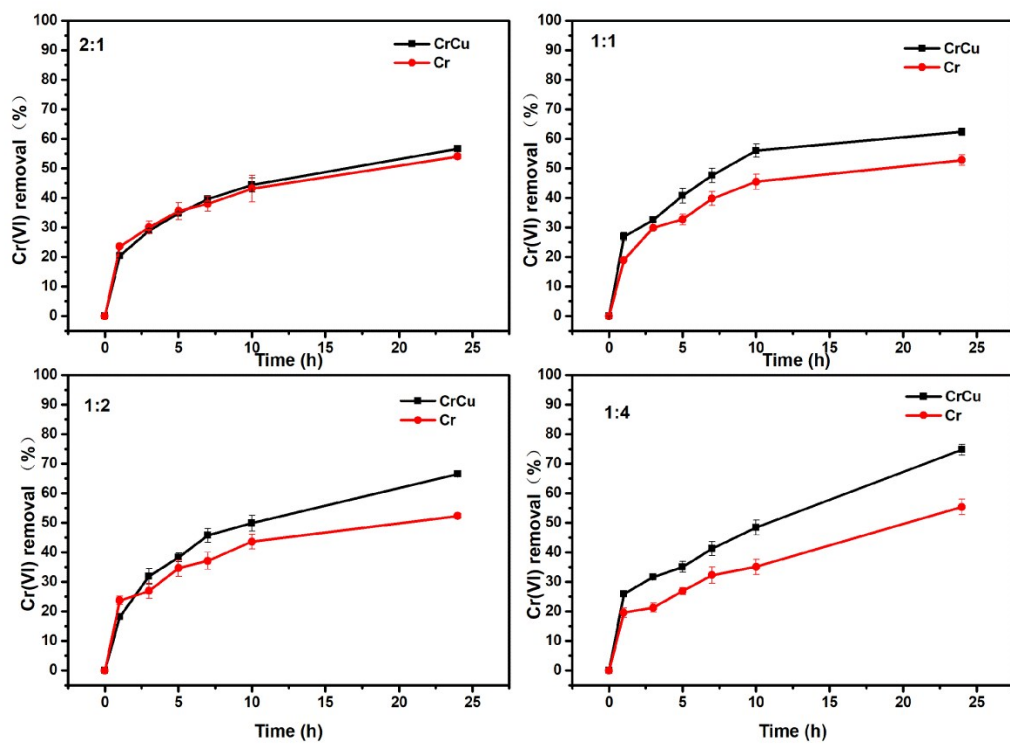

**Fig. S2.** The Cr(VI) removal of MFCs with different Cr(VI)/Cu(II) concentration ratios.

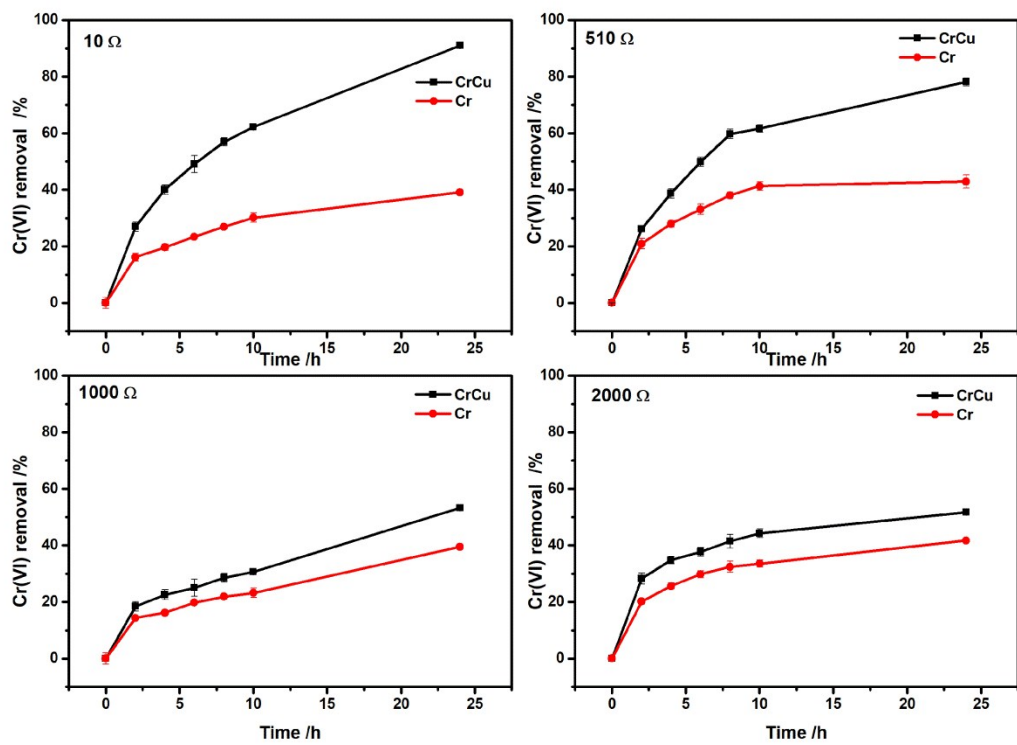

**Fig. S3.** The Cr(VI) removal of MFCs with different external resistances.

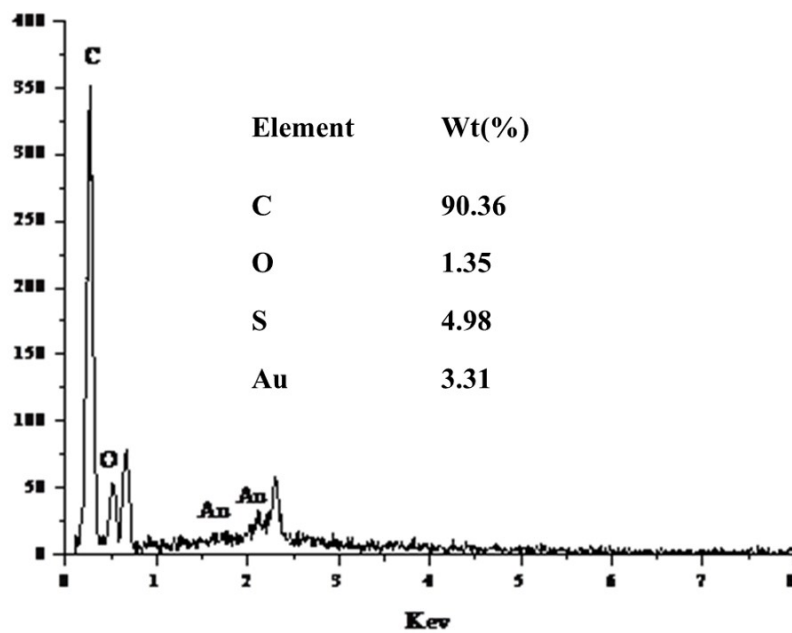

**Fig. S4.** The analysis of element contents by EDS on the BioAu/MWCNT electrode surface before operation.
